# Supplementary material for: Enhanced hydrogen sorption in a Li–Mg–N–H system by the synergistic role of Li4(NH2)3BH4 and ZrFe2
Source: Royal Society of Chemistry journal article supplement (doi:10.1039/c6cp08333a), 2017-01-01
Supplement: c6cp08333a1.pdf [file c6cp08333a1.pdf]

## Supplementary Information

### Enhanced hydrogen sorption in Li-Mg-N-H system by synergistic role of

### $\text{Li}_4(\text{NH}_2)_3\text{BH}_4$ and $\text{ZrFe}_2$

Vivek Shukla<sup>a</sup>, Ashish Bhatnagar<sup>a</sup>, Pawan Soni<sup>a</sup>, Alok K. Vishwakarma<sup>a</sup>, M A Shaz<sup>a</sup>, T P  
Yadav<sup>a</sup>, O N Srivastava<sup>a\*</sup>

<sup>a</sup>Hydrogen Energy Centre, Department of Physics, Banaras Hindu University, Varanasi-221005, India

Corresponding author: email: [heponsphy@gmail.com](mailto:heponsphy@gmail.com)

### S1

During the dehydrogenation of TT L-M and TT L-M-B-Z sample, the gaseous products were analyzed by Gas Chromatography (GC) using two types of columns i.e. Carbosphere and Chromosorb Columns (Fig-S4 (i-iv)). In the Carbosphere column, only  $\text{H}_2$  and  $\text{N}_2$  can be detected, however in Chromosorb column both  $\text{H}_2$  and  $\text{NH}_3$  can be detected. It has been found from GC measurement that TT L-M contains,  $\text{H}_2$  and  $\text{NH}_3$  whereas TT L-M-B-Z sample contains 99.90 % of  $\text{H}_2$  were detected and the peak that of  $\text{NH}_3$  is not discernible. These results suggest that  $\text{LiBH}_4$  added sample suppresses the  $\text{NH}_3$  liberation during dehydrogenation.

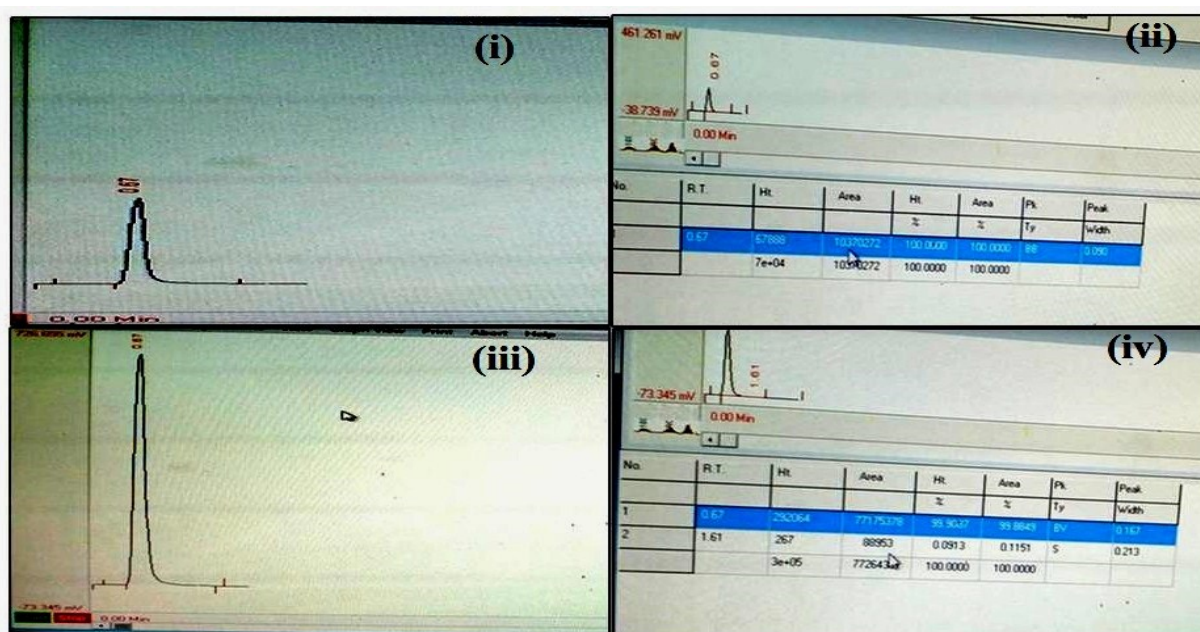

**Figure.** S1 Gas chromatography (GC) measurement using Carbosphere and Chromosorb columns (i-ii) Detection of pure  $\text{H}_2$  in Chromosorb column (iii-iv) Detection of evolved gases on the dehydrogenation of TT L-M-B-Z sample in Chromosorb column.

**S2**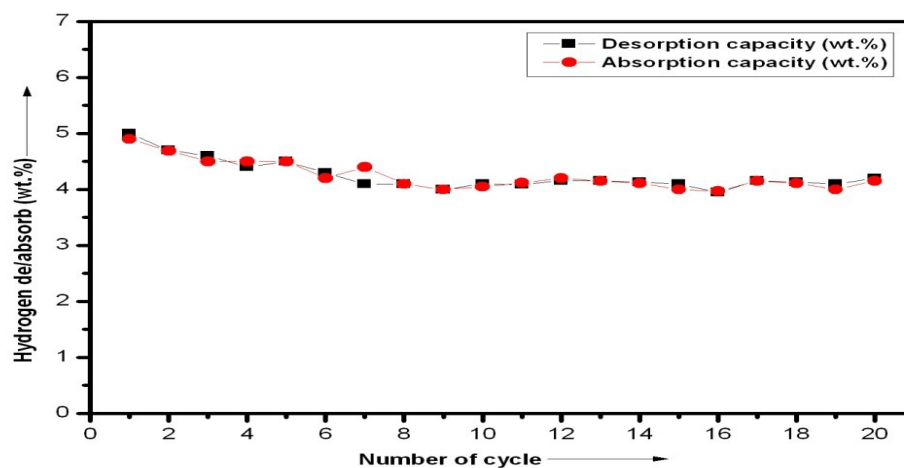

**Figure. S2** Storage capacity upon cycling (180°C and 7 MPa) of catalysed TT L-M-B-Z composite.

### S.3

#### Synthesis of $\text{Li}_4(\text{NH}_2)_3\text{BH}_4$ and its effect on hydrogen sorption in $2 \text{LiNH}_2\text{-}1.1\text{MgH}_2\text{-}0.1\text{Li}_4(\text{NH}_2)_3\text{BH}_4$

The synthesis of  $\text{Li}_4(\text{NH}_2)_3\text{BH}_4$  has been done by ball milling of  $\text{LiNH}_2$  and  $\text{LiBH}_4$  in ratio of 3:1 for 20 hours at 200 rpm under 1MPa  $\text{H}_2$  pressure. The ball milled material have been characterized by XRD, which shows that the synthesized material is  $\text{Li}_4(\text{NH}_2)_3\text{BH}_4$ . Afterwards the as synthesized material ( $\text{Li}_4(\text{NH}_2)_3\text{BH}_4$ ) was mixed with  $\text{LiNH}_2\text{-MgH}_2$ . The molar ratio of  $\text{LiNH}_2\text{:MgH}_2\text{:Li}_4(\text{NH}_2)_3\text{BH}_4$  (L-M-Q) was taken to be 2:1:0.1 . Ball milling of L-M-Q was done for 10hrs at 200 rpm under 1 MPa of  $\text{H}_2$  pressure. Fig.S2(i-a) depicts the XRD of ball milled LMQ which shows dominant presence of  $\text{LiNH}_2$  and  $\text{MgH}_2$  with some weak peaks of  $\text{Mg}(\text{NH}_2)_2$  .After thermal treatment (200°C and 7MPa  $\text{H}_2$  pressure ) of L-M-Q sample (TT L-M-Q), it was observed that (Fig. S2(i-b)) peaks of  $\text{LiNH}_2$  and  $\text{MgH}_2$  were present together with some less intense peaks of  $\text{Mg}(\text{NH}_2)_2/\text{LiH}$ , which indicates that  $\text{LiNH}_2$  and  $\text{MgH}_2$  remains mainly unreacted even after annealing. On the other hand, in case of in-situ formed quaternary hydride catalyzed Li-Mg-NH system (TT-L-M-B), there is almost complete formation of  $\text{Mg}(\text{NH}_2)_2/\text{LiH}$  (phase having reversible  $\text{H}_2$  storage) even after ball milling. Fig.S2(ii) displays the TPD curve of TT L-M-Q composite where the onset desorption temperature is  $\sim 200^\circ\text{C}$  with total release of 5.50wt.%  $\text{H}_2$  up to  $350^\circ\text{C}$ . However in case of TT-L-M-B the onset desorption temperature is  $150^\circ\text{C}$  with a total release of 5.20 wt.%  $\text{H}_2$  up to  $300^\circ\text{C}$ .

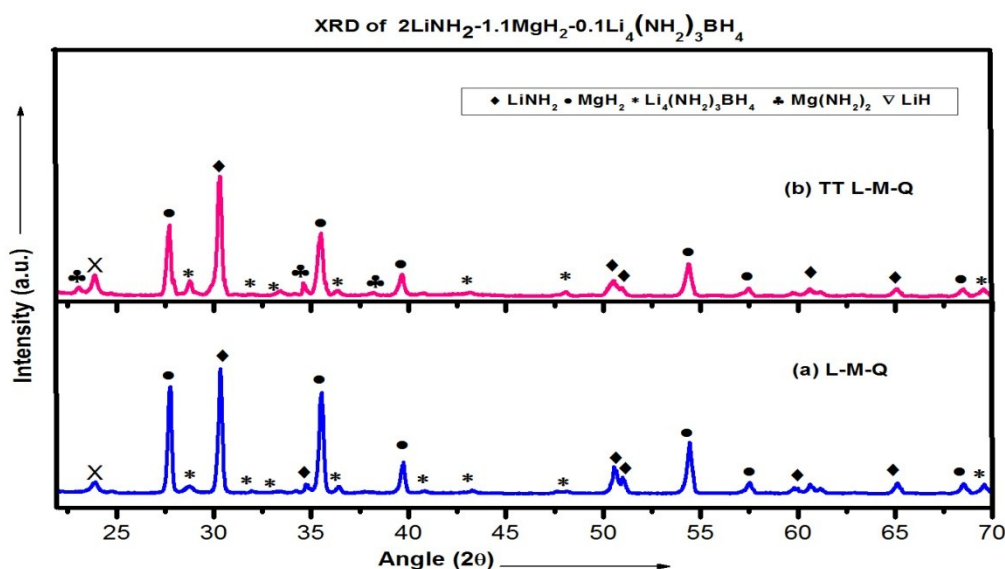

Fig.S2(i) XRD of L-M-Q and TT L-M-Q sample

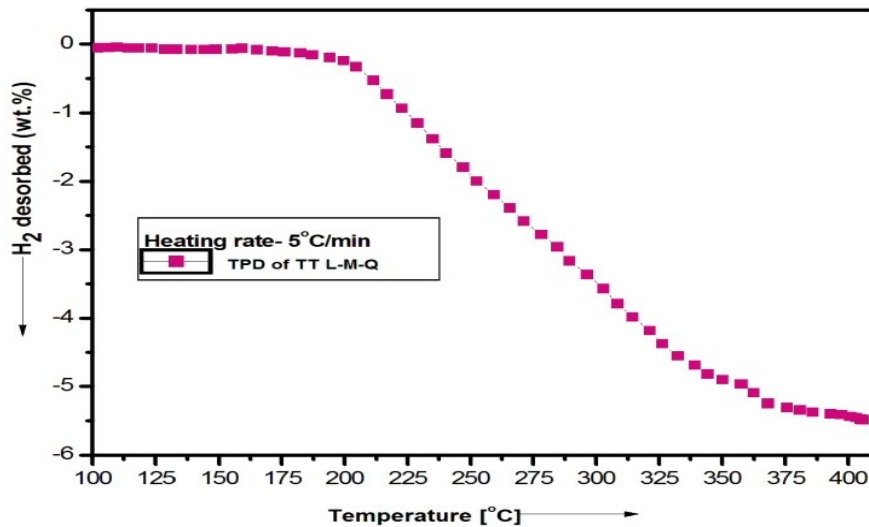

Fig.S2(ii) TPD of TT L-M-Q sample

S4

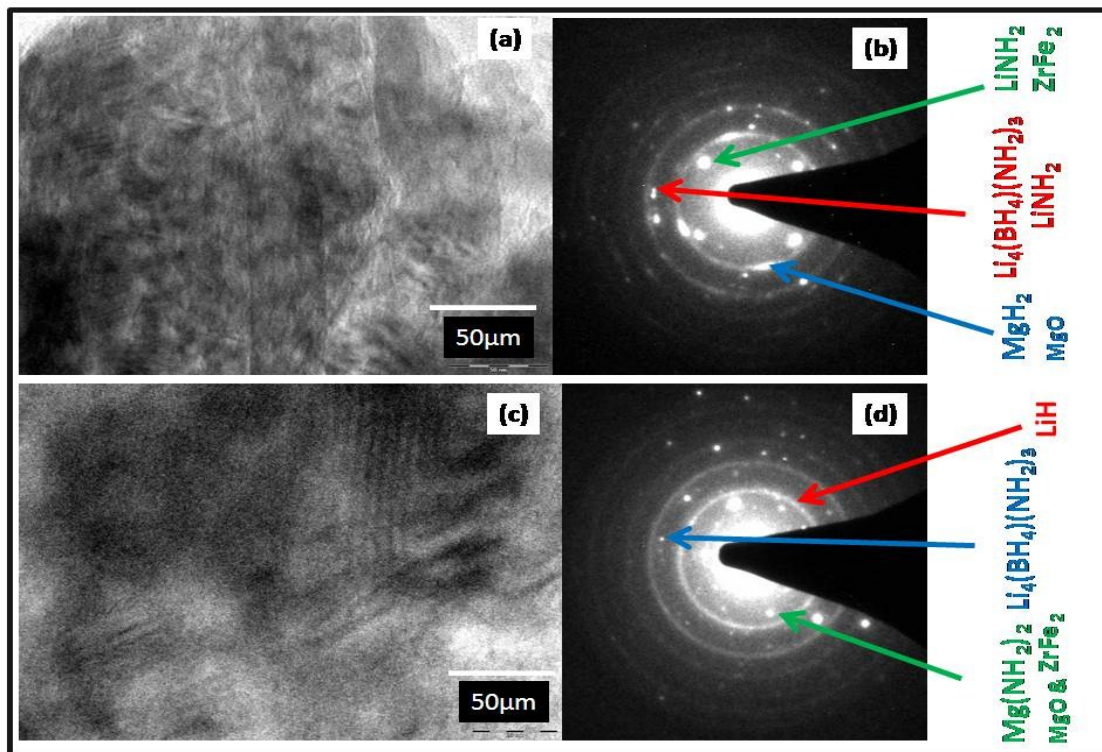

**Figure S4** Transmission Electron Micrograph of (a) L-M-B-Z sample (b) Selected area diffraction pattern (SAED) of L-M-B-Z sample (c) After cycling TT L-M-B-Z (d) Selected area diffraction pattern (SAED) of after cycled TT L-M-B-Z sample.
